# Supplementary material
Source: PubMed Central journal article supplement (PMC4302761)
Supplement: NIHMS650283-supplement-1.pdf [file NIHMS650283-supplement-1.pdf]

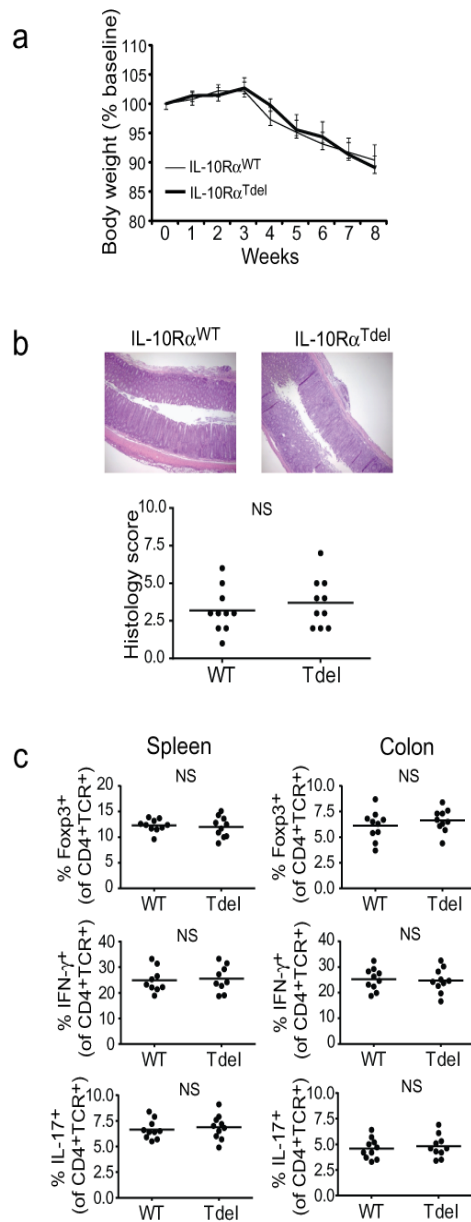

**Supplementary Figure 1. IL-10-mediated colitis is independent of the T cell IL-10 response.**

Colitis was induced in Rag1<sup>-/-</sup> mice by transfer of  $5 \times 10^5$  CD4<sup>+</sup>CD25<sup>-</sup>CD45RB<sup>hi</sup> T cells from C57BL/6 or IL-10R $\alpha$ <sup>Tdel</sup> mice. (A) Mean $\pm$ 1 s.e.m. percent of initial body weight is plotted. (B) Representative photomicrographs and tallied histopathologic scores from H&E stained colon sections obtained 8 wk after disease induction. (C) Frequency of IL-17<sup>+</sup>, IFN- $\gamma$ <sup>+</sup> and Foxp3<sup>+</sup> cells among CD4<sup>+</sup> T cells collected from colons and spleen of 8 wk diseased mice.

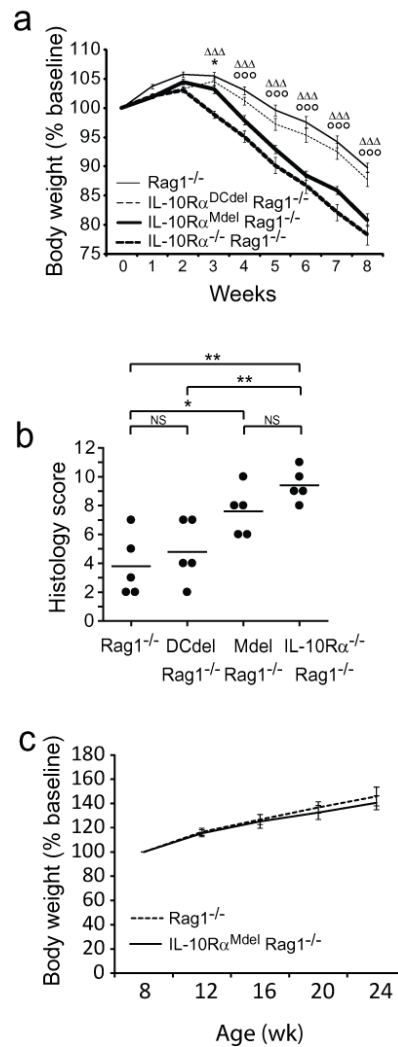

**Supplementary Figure 2. Macrophage but not DC IL-10R $\alpha$  expression protects mice from T cell-induced colitis.** Colitis was induced by transfer of  $5 \times 10^5$  C57BL/6 CD4<sup>+</sup>CD25<sup>-</sup>CD45RB<sup>hi</sup> T cells into Rag1<sup>-/-</sup>, IL-10R $\alpha$ <sup>Mdel</sup>Rag1<sup>-/-</sup>, IL-10R $\alpha$ <sup>DCdel</sup>Rag1<sup>-/-</sup> and IL-10R $\alpha$ <sup>-/-</sup>Rag1<sup>-/-</sup> mice. (A) Change in body weight was monitored. Mean  $\pm$  1 s.e.m. percent of initial body weight is plotted. \*, IL-10R $\alpha$ <sup>-/-</sup>Rag1<sup>-/-</sup> vs IL-10R $\alpha$ <sup>Mdel</sup>Rag1<sup>-/-</sup>; °, Rag1<sup>-/-</sup> vs IL-10R $\alpha$ <sup>Mdel</sup>Rag1<sup>-/-</sup>; Δ, Rag1<sup>-/-</sup> vs IL-10R $\alpha$ <sup>-/-</sup>Rag1<sup>-/-</sup> recipient mice. One and three symbols correspond to  $p < 0.05$  and  $p < 0.001$ . No significant differences were seen between IL-10R $\alpha$ <sup>DCdel</sup>Rag1<sup>-/-</sup> and Rag1<sup>-/-</sup> mice. (B) Tallied histopathologic scores from H&E stained colon sections obtained 8 wk after disease induction. \*,  $p < 0.05$ ; \*\*,  $p < 0.01$ . (C) Weight gain in Rag1<sup>-/-</sup> and IL-10R $\alpha$ <sup>Mdel</sup>Rag1<sup>-/-</sup> mice observed for 24 wk. Differences are not significant.

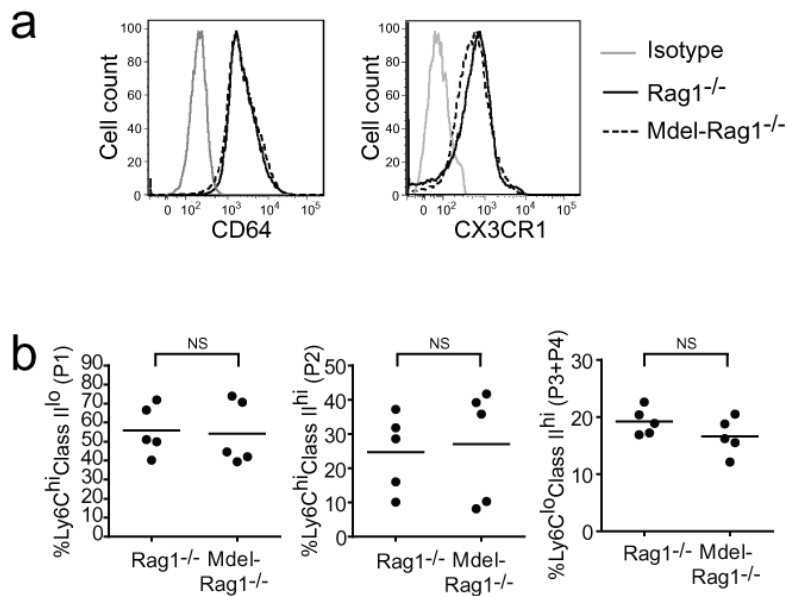

**Supplementary Figure 3. Phenotypic analysis of LPM $\phi$ s.** (A) Flow cytometric analysis of CD64 and CX3CR1 expression among colonic CD11b<sup>hi</sup>CD11c<sup>-/lo/mod</sup>F4/80<sup>+</sup>Ly6G<sup>-/lo</sup>SiglecF<sup>-</sup> cells. (B) Colonic macrophages, gated as CD11b<sup>+</sup>CD64<sup>+</sup>CD103<sup>-</sup>CD45<sup>+</sup> were segregated into populations based on Ly6C and class II MHC expression. Relative proportions of cells in the indicated categories, denoted as P1, P2, and P3+P4 are shown. No significant differences were identified between populations for the categories shown or among total Ly6C<sup>hi</sup> (P1+P2) cells.

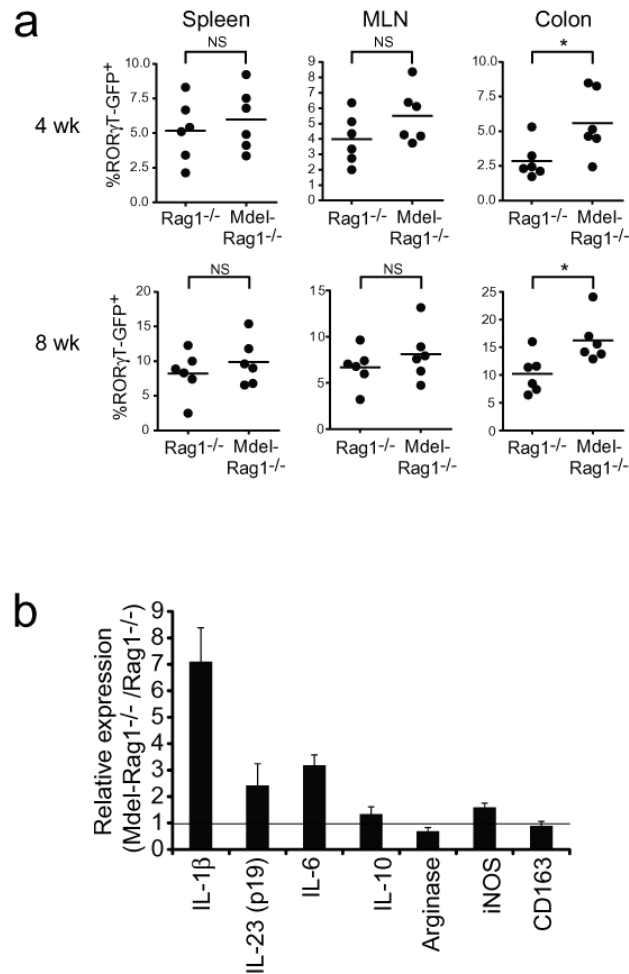

**Supplementary Figure 4. Increased Th17 T cell induction in IL-10R $\alpha$ <sup>Mdel</sup>Rag1<sup>-/-</sup> mice.** (A) Colitis was induced by transfer of  $5 \times 10^5$  CD4<sup>+</sup>CD25<sup>-</sup>CD45RB<sup>hi</sup> ROR $\gamma$ T-GFP T cells into Rag1<sup>-/-</sup> and IL-10R $\alpha$ <sup>Mdel</sup>Rag1<sup>-/-</sup> mice. Percent of CD4<sup>+</sup>TCR<sup>+</sup> cells positive for ROR $\gamma$ T-GFP in the spleen, MLN, and colon at 4 and 8 wk after disease induction is plotted. \*, <0.05. (B) Relative expression of the indicated mRNAs from CD11b<sup>+</sup>CD64<sup>+</sup>CD103<sup>-</sup>CD45<sup>+</sup>Ly6C<sup>hi</sup> LPM $\phi$ s sorted from colon tissue of mice with colitis and measured by qRT-PCR. The expression ratio (mean+1 s.d.) of IL-10R $\alpha$ <sup>Mdel</sup>Rag1<sup>-/-</sup> and Rag1<sup>-/-</sup> mice is plotted.

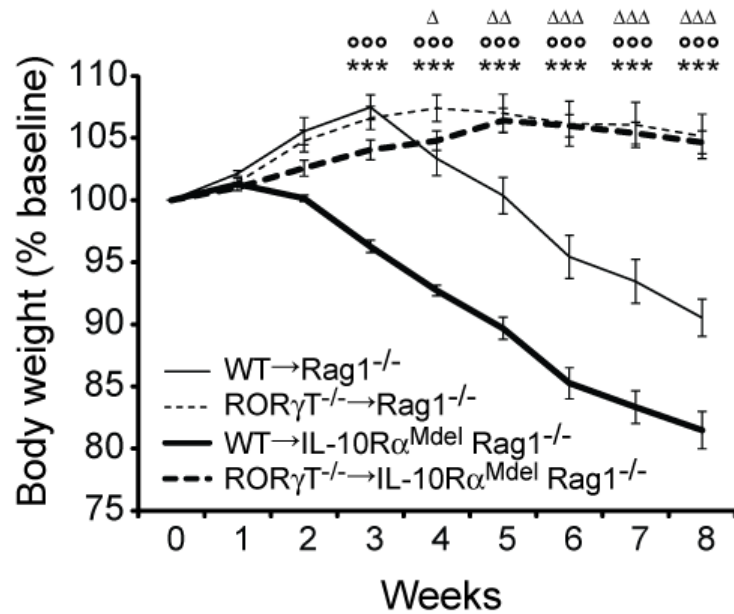

**Supplementary Figure 5. RORγT dependence of T cell induced colitis in IL-10Rα<sup>Mdel</sup>Rag1<sup>-/-</sup> mice.** Colitis was induced by transfer of 5x10<sup>5</sup> C57BL/6 or RORγT<sup>-/-</sup> CD4<sup>+</sup>CD25<sup>+</sup>CD45RB<sup>hi</sup> T cells into Rag1<sup>-/-</sup> and IL-10Rα<sup>Mdel</sup>Rag1<sup>-/-</sup> mice. Mean±1 s.e.m. percent of initial body weight is plotted. \*, WT→Rag1<sup>-/-</sup> vs WT→IL-10Rα<sup>Mdel</sup>Rag1<sup>-/-</sup>; °, WT→IL-10Rα<sup>Mdel</sup>Rag1<sup>-/-</sup> vs RORγT<sup>-/-</sup>→IL-10Rα<sup>Mdel</sup>Rag1<sup>-/-</sup>; Δ, WT→Rag1<sup>-/-</sup> vs RORγT<sup>-/-</sup>→Rag1<sup>-/-</sup> mice. One, two, and three symbols correspond to p<0.05, p<0.01, and p<0.001. No significant differences between RORγT<sup>-/-</sup>→Rag1<sup>-/-</sup> and RORγT<sup>-/-</sup>→IL-10Rα<sup>Mdel</sup>Rag1<sup>-/-</sup> mice were seen.

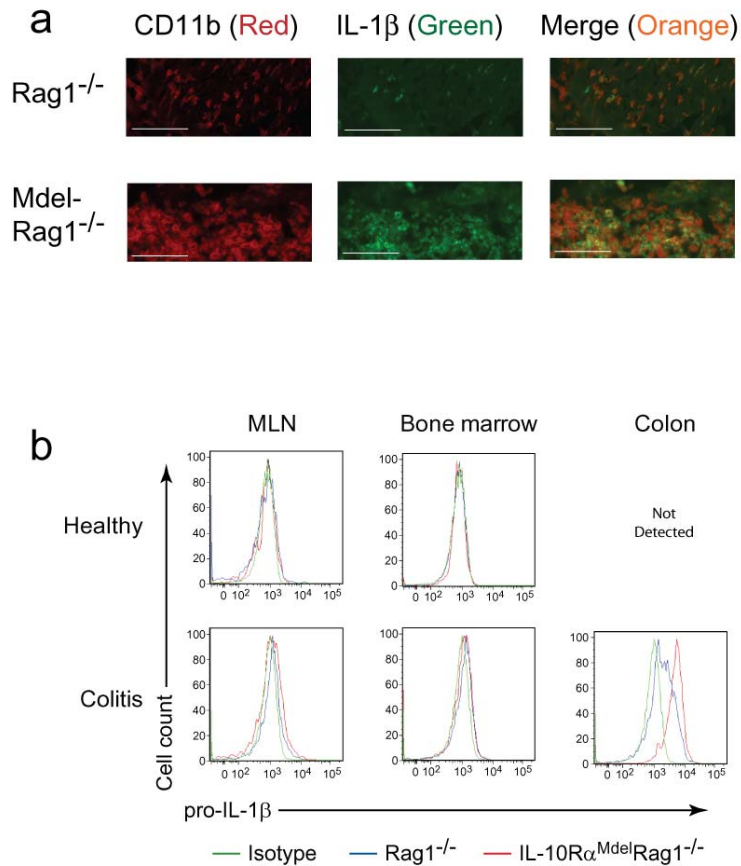

**Supplementary Figure 6. Elevated colonic IL-1 $\beta$  production in IL-10R $\alpha^{\text{Mdel}}$ Rag1<sup>-/-</sup> LPM $\phi$ s.** (A) Colons from Rag1<sup>-/-</sup> and IL-10R $\alpha^{\text{Mdel}}$ Rag1<sup>-/-</sup> were isolated 8 wk after colitis induction and cryo-sectioned for immunohistochemistry. Representative confocal images from Rag1<sup>-/-</sup> and IL-10R $\alpha^{\text{Mdel}}$ Rag1<sup>-/-</sup> sections co-stained for IL-1 $\beta$  (green) and CD11b (red) show overlap between positive populations. Bar corresponds to 50  $\mu$ m. (B) Flow cytometry of MLN, bone marrow, and colonic M $\phi$ s was performed similarly to Fig. 7a. Representative overlay plots showing isotype or pro-IL-1 $\beta$  expression in cells from Rag1<sup>-/-</sup> and IL-10R $\alpha^{\text{Mdel}}$ Rag1<sup>-/-</sup> mice in which colitis was not induced (top row) or 8 wk after the induction of colitis (bottom row) are shown.

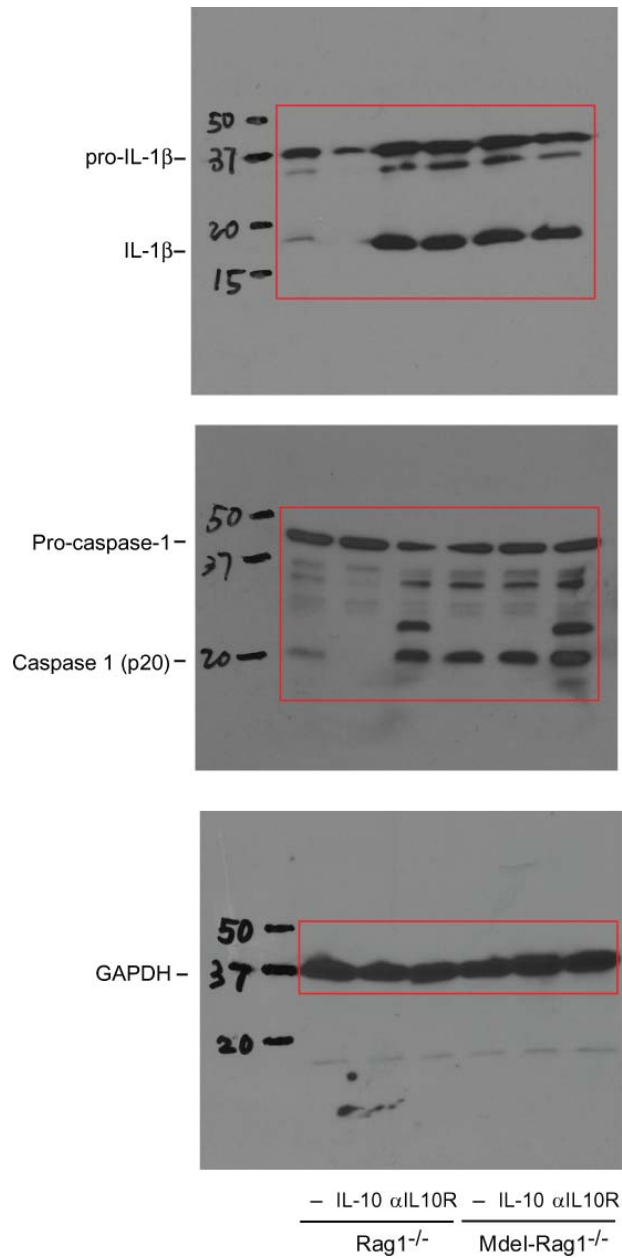

**Supplementary Figure 7. Full size Western blot analyses.** Full size scans of blots presented in cropped format in Figure 7b are presented. Numbers with dashes indicate position of MW markers. Red boxes show approximate regions of cropped images.
